# Supplementary material for: Quality of reporting of complex healthcare interventions and applicability of the CReDECI list - a survey of publications indexed in PubMed
Source: PubMed Central journal article supplement (PMC3871759; doi:10.1186/1471-2288-13-125), 2013-10-19
Supplement: 1471-2288-13-125-S1.pdf [file 1471-2288-13-125-S1.pdf]

### **Complete search strategy**

(complex intervention\* OR complex nursing intervention\*) OR (((MRC OR Medical Research Council) AND framework) OR ((MRC OR Medical Research Council) AND guidance))

Limits: Clinical Trial, Randomized Controlled Trial, English, German, published in the last 10 years
